# Supplementary material for: Dietary Behaviors in Psoriasis: Patient-Reported Outcomes from a U.S. National Survey
Source: Springer Nature journal article supplement (doi:10.1007/s13555-017-0183-4), 2017-05-19
Supplement: MOESM3 [file 12300286]

## Sheet: Sheet1
Univariate analysis of demographic factors associated with dietary changes and perceptions
* Full survey questions that correspond to the Q# for each column and row can be found in the survey instrument provided in the appendix within the supplementary material
	Q1_Age	Q51_Age of Onset	Q56&57_BMI	Q53_Celiac disease	Q59_Education	Q52_Family Hx	Q61_Income	Q60_Living Environment	Q55_Skin Rating (mild, mod, severe)	Q50_PsA	Q58_Race	Q2_Sex	BSA (without tx skin)
Q33_avoid_reduce___1 (Red meat)
MW	<.0001	0.55	0.54
X2				0.95²	0.94²	0.38²	0.46	0.17²	0.0058	0.10²	0.44²	0.90²	0.018
Z					0.85		0.055		0.018				0.0009
KW					0.8		0.046		0.012				0.001
Q33_avoid_reduce___2 (Pork)
MW	1	0.22	0.82
X2				0.11²	0.57	0.088²	0.042	0.33²	0.32	0.78²	0.15²	0.20²	0.12
Z					0.31		0.011		0.18				0.083
KW					0.4		0.019		0.16				0.077
Q33_avoid_reduce___3 (Shellfish)
MW	0.32	0.55	0.12
X2				0.098²	0.8	0.95²	0.48	0.75²	0.031	0.49²	0.031²	0.87²	0.031
Z					0.47		0.058		0.0096				0.0015
KW					0.51		0.063		0.011				0.0015
Q33_avoid_reduce___4 (Sodium/salt)
MW	<.0001	0.014	0.64
X2				0.99²	0.0042	0.79²	0.41	0.77²	0.077	<.0001²	0.63²	0.028²	0.049
Z					0.17		0.13		0.034				0.016
KW					0.19		0.13		0.03				0.015
Q33_avoid_reduce___5 (Gluten)
MW	0.0001	0.035	0.36
X2				<.0001²	0.85	0.059²	0.73	0.82²	0.56	0.63²	0.20²	<.0001²	0.0049
Z					0.58		0.14		0.29				0.0022
KW					0.66		0.16		0.29				0.0039
Q33_avoid_reduce___6 (White flour)
MW	0.31	0.88	0.69
X2				0.023²	0.32	0.38²	0.58	0.030²	0.11	0.13²	0.15²	0.18²	0.059
Z					0.086		0.55		0.089				0.0067
KW					0.12		0.41		0.11				0.0086
Q33_avoid_reduce___7 (Nightshades)
MW	0.085	0.047	0.39
X2				<.0001²	0.74	0.32²	0.085	0.98²	0.24	0.32²	0.80²	0.011²	0.14
Z					0.85		0.32		0.14				0.015
KW					0.75		0.46		0.12				0.016
Q33_avoid_reduce___8 (Dairy)
MW	0.001	0.012	0.62
X2				0.075²	0.8	0.035²	0.53	0.29²	0.89	0.54²	0.93²	0.32²	0.18
Z					0.87		0.84		0.82				0.018
KW					0.98		0.9		0.8				0.018
Q33_avoid_reduce___9 (High fat)
MW	<.0001	0.071	0.43
X2				0.66²	0.32	0.26²	0.3	0.52²	0.0049	0.043²	0.67²	0.57²	0.0006
Z					0.73		0.076		0.0011				0.0004
KW					0.52		0.061		0.0012				0.0005
Q33_avoid_reduce___10 (Junk food)
MW	0.99	0.84	0.97
X2				0.67²	0.89	0.42²	0.68	0.75²	0.35	0.15²	0.56²	0.77²	0.0084
Z					0.5		0.78		0.19				0.0017
KW					0.51		0.7		0.18				0.0016
Q33_avoid_reduce___11 (Caffeine)
MW	0.025	0.054	0.72
X2				0.90²	0.85	0.54²	0.37	0.95²	0.42	0.81²	0.18²	0.18²	0.064
Z					0.9		0.45		0.39				0.32
KW					0.83		0.47		0.35				0.42
Q33_avoid_reduce___12 (Alcohol)
MW	0.014	0.089	0.069
X2				0.086²	0.73	0.077²	0.44	0.90²	0.036	0.11²	0.67²	0.12²	0.051
Z					0.53		0.047		0.019				0.0033
KW					0.43		0.049		0.015				0.0032
Q33_avoid_reduce___13 (Tobacco)
MW	0.043	0.82	0.22
X2				0.81²	0.97	0.36²	0.15	0.60²	0.14	0.18²	0.50²	0.0029²	0.04
Z					0.78		0.0094		0.12				0.008
KW					0.78		0.0071		0.1				0.0096
Q33_avoid_reduce___14 (Other)
MW	0.24	0.38	0.36
X2				0.50²	0.24	0.33²	0.56	0.13²	0.63	0.11²	0.40²	0.057²	0.57
Z					0.069		0.7		0.76				0.97
KW					0.11		0.54		0.71				0.99
Q33_redmeat_skinresponse
MW	0.012	0.049	0.93
X2				0.65²	0.25	0.72²	0.28²	0.83²	0.81²	0.019²	0.0064²	0.15²	0.66²
Rho					0.52		0.81		0.5				0.056
Q33_pork_skinresponse
MW	0.13	0.24	0.32
X2				0.43²	0.0057	0.78²	0.38²	0.54²	0.86²	0.16²	0.042²	0.43²	0.15²
Rho					0.54		0.14		0.63				0.19
Q33_shellfish_skinresponse
MW	0.59	0.044	0.71
X2				0.66²	0.011	0.90²	0.0053²	0.50²	0.40²	0.23²	0.012²	0.54²	0.14²
Rho					0.48		0.25		0.48				0.15
Q33_sodium_salt_skinresponse
MW	0.0021	0.17	0.32
X2				0.70²	0.78	0.58²	0.19²	0.14²	0.63²	0.019²	<.0001²	0.33²	0.93²
Rho					0.73		0.23		0.9				0.74
Q33_gluten_skinresponse
MW	0.87	0.3	0.93
X2				0.011²	0.18	0.39²	0.90²	0.90²	0.81²	0.23²	0.59²	0.44²	0.19²
Rho					0.52		0.99		0.82				0.59
Q33_white_flour_skinresponse
MW	0.02	0.47	0.76
X2				<.0001²	0.47	0.70²	0.85²	0.72²	0.87²	0.53²	0.61²	0.16²	0.77²
Rho					0.29		1		0.98				0.29
Q33_nightshades_skinresponse
MW	0.62	0.086	0.56
X2				0.69²	0.3	0.59²	0.074²	0.91²	0.39²	0.036²	0.21²	0.21²	0.30²
Rho					0.83		0.69		0.42				0.98
Q33_dairy_skinresponse
MW	0.18	0.33	0.67
X2				0.080²	0.13	0.70²	0.44²	0.77²	0.89²	0.31²	0.0001²	0.65²	0.46²
Rho					0.51		0.2		0.74				0.66
Q33_high_fat_skinresponse
MW	0.028	0.32	0.27
X2				0.31²	0.088	0.21²	0.42²	0.77²	0.41²	0.35²	0.031²	0.38²	0.82²
Rho					0.51		0.8		0.35				0.77
Q33_junk_food_skinresponse
MW	0.0002	0.06	0.14
X2				0.33²	0.63	0.60²	0.35²	0.60²	0.94²	0.67²	0.45²	0.46²	0.45²
Rho					0.32		0.57		0.6				0.45
Q33_caffeine_skinresponse
MW	0.46	0.19	0.94
X2				0.29²	0.0004	0.61²	<.0001²	0.70²	0.038²	0.0012²	0.093²	0.79²	0.14²
Rho					0.42		0.082		0.0064				0.068
Q33_alcohol_skinresponse
MW	<.0001	0.036	0.37
X2				0.60²	0.036	0.16²	0.61²	0.18²	0.75²	0.095²	0.0077²	0.51²	0.079²
Rho					0.66		0.97		0.44				0.25
Q33_tobacco_skinresponse
MW	<.0001	0.0021	0.37
X2				0.034²	0.053	0.081²	0.064²	0.49²	0.43²	0.38²	0.011²	0.054²	0.065²
Rho					0.74		0.21		0.99				0.96
Q34_additions___1 (Fruits)
MW	0.92	0.37	0.19
X2				0.020²	0.45	0.67²	0.3	0.72²	0.62	0.0064²	0.013²	0.16²	0.33
Z					0.82		0.03		0.82				0.071
KW					0.61		0.035		0.88				0.075
Q34_additions___2 (Vegetables)
MW	0.022	0.18	0.017
X2				0.028²	0.94	0.38²	0.68	0.79²	0.48	0.019²	0.020²	0.53²	0.42
Z					0.7		0.39		0.61				0.094
KW					0.68		0.35		0.56				0.11
Q34_additions___3 (Organic foods)
MW	0.42	0.75	0.56
X2				0.0006²	0.13	0.28²	0.87	0.23²	0.94	0.41²	0.74²	0.016²	0.89
Z					0.029		0.64		0.72				0.93
KW					0.046		0.74		0.73				0.93
Q34_additions___4 (Probiotics)
MW	0.81	0.94	0.011
X2				0.20²	0.31	0.47²	0.045	0.42²	0.27	0.22²	0.24²	0.0002²	0.58
Z					0.87		0.86		0.15				0.61
KW					0.71		1		0.16				0.64
Q34_additions___5 (Fish oil/Omega-3)
MW	0.7	0.87	0.94
X2				0.43²	0.12	0.042²	0.19	0.81²	0.61	0.69²	0.70²	0.72²	0.67
Z					0.11		0.091		0.57				0.67
KW					0.21		0.088		0.61				0.65
Q34_additions___6 (Vitamin D)
MW	0.0001	0.69	0.014
X2				0.30²	0.51	0.80²	0.44	0.38²	0.48	<.0001²	0.020²	0.0008²	0.69
Z					0.24		0.16		0.56				0.27
KW					0.32		0.18		0.51				0.25
Q34_additions___7 (Other)
MW	0.64	0.16	0.19
X2				0.027²	0.9	0.91²	0.93	0.77²	0.24	0.82²	0.12²	0.12²	0.39
Z					0.49		0.45		0.12				0.43
KW					0.5		0.47		0.11				0.49
Q34_fruits_skinresponse
MW	0.078	0.88	0.82
X2				0.0016²	0.010²	0.023²	0.14²	0.042²	0.76²	0.22²	0.0007²	0.20²	0.15²
Rho					0.34		0.21		0.54				0.36
Q34_vegetables_skinresponse
MW	0.14	0.19	0.67
X2				0.15²	0.22²	0.39²	0.48²	0.12²	0.78²	0.66²	0.027²	0.65²	0.48²
Rho					0.65		0.43		0.42				0.61
Q34_organic_skinrespone
MW	0.49	0.39	0.5
X2				0.048²	0.0001²	0.74²	0.0059²	0.011²	0.78²	0.73²	0.76²	0.49²	0.37²
Rho					0.012		0.56		0.99				0.068
Q34_probiotics_skinrespone
MW	0.59	0.69	0.87
X2				0.0001²	0.0002²	0.97²	0.34²	0.034²	0.28²	0.82²	0.12²	0.19²	0.39²
Rho					0.0023		0.57		0.07				0.73
Q34_fishoil_o3_skinrespone
MW	0.034	0.41	0.65
X2				0.79²	0.080²	0.52²	0.19²	0.45²	0.41²	0.53²	0.086²	0.33²	0.71²
Rho					0.31		0.89		0.15				0.056
Q34_vitd_skinresponse
MW	0.15	0.38	0.6
X2				0.0004²	0.0009²	0.47²	0.34²	0.026²	0.64²	0.41²	0.62²	0.58²	0.15²
Rho					0.027		0.41		0.42				0.031
Q38_diet_role
MW	<.0001	0.27	0.71
X2				0.0026²	0.036²	0.14²	0.26²	0.40²	0.044²	0.0046²	0.098²	0.26²	0.38²
Rho							0.18		0.65				0.023
Q41_burdensome
MW	<.0001	0.0014	0.53
X2				0.0049²	0.29²	0.20²	0.77²	0.17²	0.17²	0.0015²	0.17²	0.0002²	0.0007²
Rho					0.64		0.11		0.0078				<.0001
Q46a_prescription_meds
MW	<.0001	0.62	0.72
X2				<.0001²	0.37²	0.36²	0.13²	0.0020²	0.0002²	<.0001²	0.82²	<.0001²	0.014²
KW					0.69		0.063		<.0001				0.0038
Q46b_otc_meds
MW	<.0001	0.42	0.88
X2				<.0001²	0.61²	0.50²	0.54²	0.49²	0.26²	0.13²	0.98²	0.0013²	0.36²
KW					0.17		0.19		0.071				0.67
Q46c_complementary_meds
MW	0.0011	0.49	0.39
X2				<.0001²	0.33²	0.36²	0.78²	0.82²	0.0038²	0.0041²	0.57²	0.11²	0.022²
KW					0.46		0.62		0.0009				0.035
Q46d_exercise_vs_diet
MW	<.0001	0.002	0.42
X2				0.0019²	0.46²	0.86²	0.45²	0.016²	0.77²	0.56²	0.64²	0.11²	0.069²
KW					0.79		0.4		0.68				0.11
Q46e_stress_reduction
MW
X2				<.0001²	0.069²	0.65²	0.81²	0.24²	0.92²	0.76²	0.34²	0.084²	0.42²
KW					0.79		0.65		0.89				0.59
Q48_dermatologist
MW
X2				0.61²	0.0093²	0.61²	0.010²	0.068²	0.0016²	0.074²	0.82²	0.28²	<.0001²
Rho					0.92		0.068		<.0001				<.0001
Q49_dermatologist_importance
MW
X2				<.0001²	0.27²	0.40²	0.30²	0.86²	0.65²	0.88²	0.41²	0.0077²	0.16²
Rho					0.11		0.89		0.12				0.002
